# Supplementary material
Source: Springer Nature journal article supplement (https://www.springermedizin.de/resource/supplementary/12881_2011_934_MOESM9_ESM.pdf/9451578)

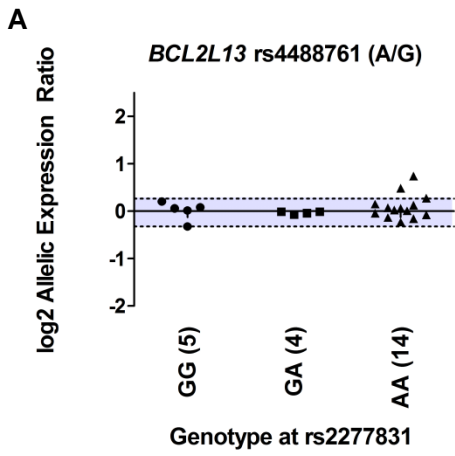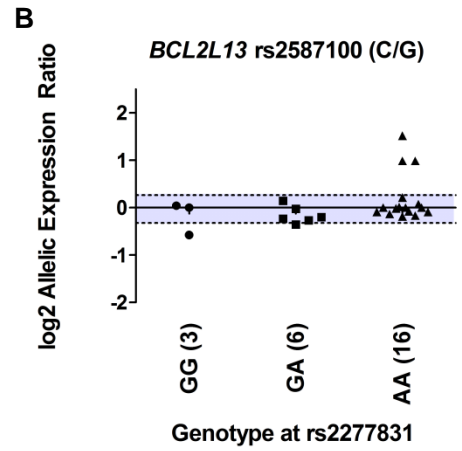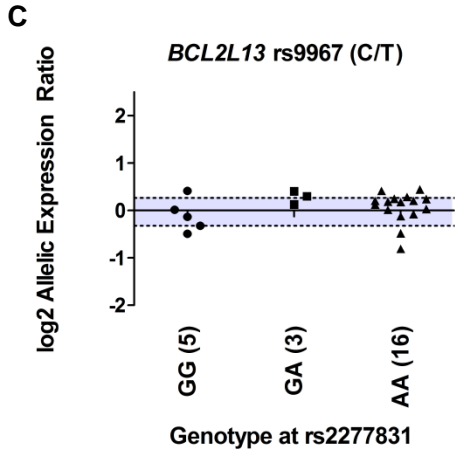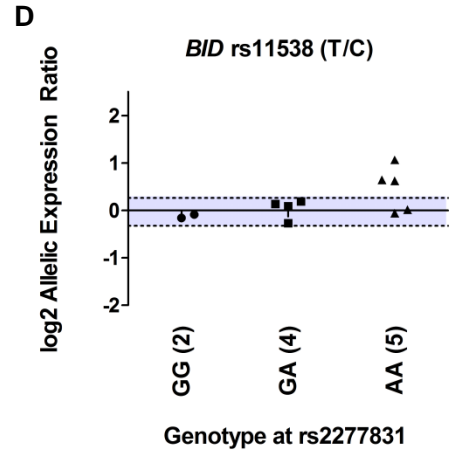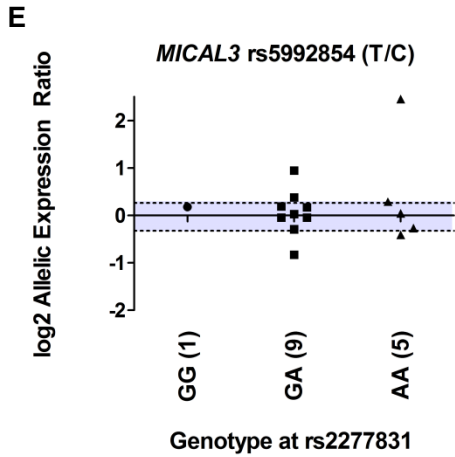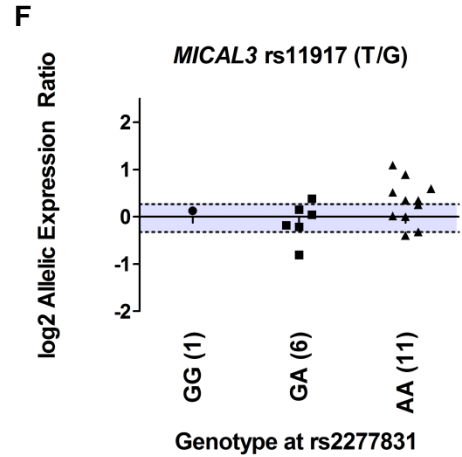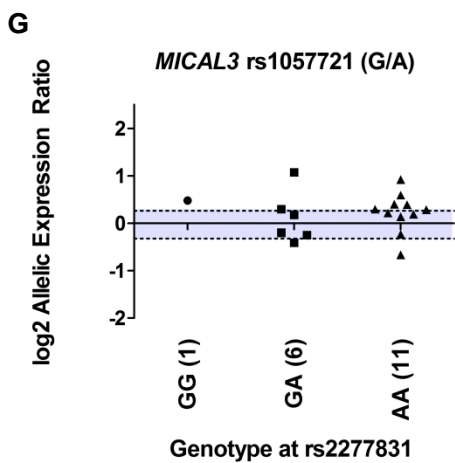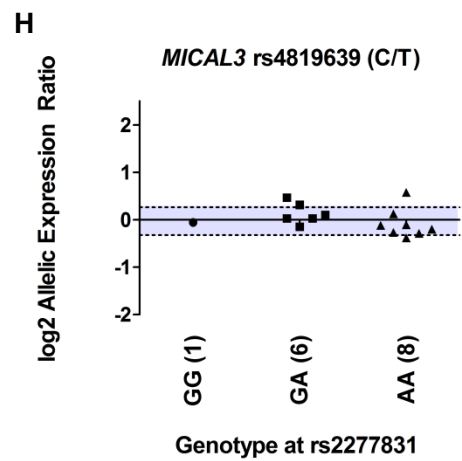

Supplement: MOESM9 [file 9451578]
